# Supplementary material for: Wildfires as a Source of Potentially Toxic Elements (PTEs) in Soil: A Case Study from Campania Region (Italy)
Source: MDPI journal article supplement (doi:10.3390/ijerph20054513), 2023-03-03
Supplement: s1 [file s1]

## Supplementary Material

**Table S1. PTEs and related Health hazard.**

| Element         | Health effects                                                                                                                                                                                                                                                                                                                                                                                                               |
|-----------------|------------------------------------------------------------------------------------------------------------------------------------------------------------------------------------------------------------------------------------------------------------------------------------------------------------------------------------------------------------------------------------------------------------------------------|
| Antimony (Sb)   | Pneumoconiosis, cardiac disorders, stomach pain, diarrhoea, stomach ulcers, skin cancers, lung cancer, etc.                                                                                                                                                                                                                                                                                                                  |
| Arsenic (As)    | Vomiting, abdominal pain, fever, diarrhoea, weakness, muscle aches, headaches, drowsiness, seizures, encephalopathy, polyneuritis, coma, seizures, oedema, hyperkeratosis, hyper pigmentation, exfoliative dermatitis, haemolysis, anaemia, hypertension, blood vessel damage, cardiomyopathy, ventricular arrhythmias, diabetes mellitus, pulmonary disorders, cancer, renal tubular acidosis, intestinal haemorrhage, etc. |
| Beryllium (Be)  | lung disease (acute and chronic), fatigue, weight loss, chest pain, coughing, dyspnea, interstitial pulmonary fibrosis                                                                                                                                                                                                                                                                                                       |
| Cadmium (Cd)    | Fatigue, nausea, vomiting, teeth yellowing, osteomalacia, osteoporosis, abdominal cramps, diarrhoea, emphysema, pulmonary oedema, dyspnoea, tachycardia, chronic anaemia, cyanosis, anosmia, proteinuria, hypercalciuria, renal tubular dysfunction, cancer, etc.                                                                                                                                                            |
| Chromium (Cr)   | Diarrhoea, vomiting, acidosis, skin diseases, cancer of lungs and respiratory tract, neural defects, foetal deaths, kidney diseases, and ulcers and lesions on the kidneys, liver, and myocardium                                                                                                                                                                                                                            |
| Cobalt (Co)     | Nausea, tinnitus, vomiting, nerve damage, respiratory problems, anorexia, goiter, cancer, and cardiovascular and renal damages                                                                                                                                                                                                                                                                                               |
| Copper (Cu)     | Diabetes; cardiac, renal, neurological, immunological, and hepatic problems; pregnancy-related complications; Wilson's disease; etc.                                                                                                                                                                                                                                                                                         |
| Lead (Pb)       | Lethargy, allergies, mental retardation, depression, anxiety, dysarthria, pallor, abdominal pain, anorexia, anaemia, ataxia, paralysis, reproductive disorders, encephalopathy, hypertension, insomnia, peripheral, papilledema, neuropathy, renal disorders, hyperproteinemia, cancer, etc.                                                                                                                                 |
| Mercury (Hg)    | Nausea, vomiting, depression, lethargy, gingivitis, dyspnoea, pulmonary oedema, lung damage, pneumonia, memory loss, cerebellar ataxia, choreoathetosis, polyneuropathy, seizures, dysarthria, mad hatter syndrome, hypertension, blindness, acrodynia, erythema, hyperesthesia, acute renal failure, cancer, etc.                                                                                                           |
| Molybdenum (Mo) | Severe gastrointestinal irritation, diarrhea, coma and death from cardiac failure are the symptoms of acute molybdenosis (only animal studies)                                                                                                                                                                                                                                                                               |
| Nickel (Ni)     | Lung cancer, pulmonary fibrosis, disorders related to cardiovascular, gastrointestinal, haematological, musculoskeletal, and hepatic systems; etc.                                                                                                                                                                                                                                                                           |
| Thallium (Tl)   | Somnolence; nausea; hematemesis; alopecia; polyneuropathy; cranial nerve palsies; cerebellar ataxia; optic atrophy; retrobulbar neuritis; ophthalmoplegia; renal and cardiac failure; coma; etc.                                                                                                                                                                                                                             |
| Tin (Sn)        | stomachache, anemia, liver and kidney problems, nervous system function, death.                                                                                                                                                                                                                                                                                                                                              |
| Vanadium (V)    | Neurological, reproductive, gastrointestinal, immunological, and lymphoreticular disorders, cancer, etc.                                                                                                                                                                                                                                                                                                                     |
| Zinc (Zn)       | Liver, reproductive, neurological, and developmental dysfunctions, etc.                                                                                                                                                                                                                                                                                                                                                      |

**Table S2.** Univariate statistics of the Enrichment Factors (EFs) determined for the soil samples collected in the surrounding of the IIsde site.

| Enrichment Factor | Mean     | Median   | Min      | Max      |
|-------------------|----------|----------|----------|----------|
| EF Mo             | 0.968217 | 0.977110 | 0.434451 | 1.373147 |
| EF Cu             | 1.060023 | 1.012055 | 0.351698 | 1.981881 |
| EF Pb             | 1.150634 | 1.029926 | 0.481488 | 4.419513 |
| EF Zn             | 0.994855 | 0.955980 | 0.727317 | 1.724233 |
| EF Ni             | 1.066976 | 1.009039 | 0.303996 | 2.653187 |
| EF Co             | 1.018711 | 1.011307 | 0.533160 | 1.830350 |
| EF As             | 0.985403 | 0.951726 | 0.411972 | 1.655629 |
| EF Cd             | 1.246235 | 1.118370 | 0.471854 | 2.813589 |
| EF Sb             | 1.084327 | 1.022842 | 0.390663 | 1.952809 |
| EF V              | 1.037075 | 1.022935 | 0.880301 | 1.301994 |
| EF Cr             | 1.040532 | 0.997020 | 0.330227 | 2.960399 |
| EF Tl             | 1.048693 | 0.963461 | 0.351296 | 2.511331 |
| EF Hg             | 1.099757 | 0.890654 | 0.346668 | 3.485063 |
| EF Sn             | 1.106063 | 1.011792 | 0.379741 | 2.485964 |
| EF Be             | 1.186221 | 0.858025 | 0.165864 | 5.410596 |

**Table S3.** Univariate statistics of the Enrichment Factors (EFs) determined for the soil samples collected in the Vesuvian area.

| <b>Enrichment Factor</b> | <b>Mean</b> | <b>Median</b> | <b>Min</b> | <b>Max</b> |
|--------------------------|-------------|---------------|------------|------------|
| EF Cu                    | 0.953123    | 0.860905      | 0.181444   | 2.906472   |
| EF Pb                    | 0.910055    | 0.86728       | 0.525009   | 1.46785    |
| EF Zn                    | 0.962654    | 0.977057      | 0.457717   | 1.666331   |
| EF Ni                    | 0.921176    | 0.913216      | 0.640284   | 1.338828   |
| EF Co                    | 0.913417    | 0.887417      | 0.612232   | 1.490708   |
| EF As                    | 1.004972    | 0.958274      | 0.662338   | 2.054702   |
| EF Cd                    | 0.962438    | 1.028049      | 0.181704   | 1.313783   |
| EF Sb                    | 0.933512    | 0.861857      | 0.208932   | 2.447409   |
| EF V                     | 0.97042     | 0.933628      | 0.596054   | 1.828924   |
| EF Cr                    | 0.943314    | 0.911748      | 0.127429   | 2.422761   |
| EF Tl                    | 0.932772    | 0.908029      | 0.590313   | 1.619048   |
| EF Hg                    | 1.35715     | 0.963434      | 0.535119   | 6.683959   |
| EF Sn                    | 0.971911    | 0.901235      | 0.485558   | 1.519196   |
| EF Be                    | 0.966262    | 0.973327      | 0.537485   | 1.422559   |
| EF Mo                    | 0.894455    | 0.875848      | 0.682204   | 1.451863   |
